# Supplementary material
Source: PubMed Central journal article supplement (PMC5470410)
Supplement: jamacardiol-2-370-s003.pdf [file jamacardiol-2-370-s003.pdf]

## Supplementary Online Content

Elam MB, Ginsberg HN, Lovato LC, et al. Association of fenofibrate therapy with long-term cardiovascular risk in statin-treated patients with type 2 diabetes. *JAMA Cardiol*. Published online December 28, 2016. doi:10.1001/jamacardio.2016.4828

**eTable 1.** Comparison of Investigator Reported Outcomes in ACCORD Versus Adjudicated Outcomes Reported by the Endpoints Committee.

**eTable 2.** Comparison of CVD Outcomes in Pre-specified subgroups sex and dyslipidemia in ACCORD and with addition of extended follow-up in ACCORDION.

**eFigure 1.** Lipid Levels By ACCORD Treatment Arm from Randomization Through the End of ACCORDION.

**eFigure 2.** Lipid Response to Fenofibrate in Hypertriglyceridemic/Low HDL-C Subgroup vs all others in ACCORD: HDL-C and Triglyceride.

**eFigure 3.** Lipid Response to Fenofibrate in Hypertriglyceridemic/Low HDL-C Subgroup vs all others in ACCORD: LDL-C and Non-HDLC.

This supplementary material has been provided by the authors to give readers additional information about their work.

**eTable 1: Comparison of Investigator Reported Outcomes in ACCORD Versus Adjudicated Outcomes Reported by the Endpoints Committee**

| Outcome                                                                                                        | Outcome Classified by:           | Fenofibrate (N=2765) |                   | Placebo (N=2753) |      | Treatment Effect (Fenofibrate / Placebo) |                         |         |
|----------------------------------------------------------------------------------------------------------------|----------------------------------|----------------------|-------------------|------------------|------|------------------------------------------|-------------------------|---------|
|                                                                                                                |                                  | Number of events     | Rate <sup>¶</sup> | Number of events | Rate | Hazard Ratio                             | 95% Confidence Interval | P Value |
| <b>Primary outcome (major fatal or nonfatal cardiovascular event)</b>                                          | ACCORD, Adjudication Committee * | 291                  | 2.24              | 310              | 2.41 | 0.92                                     | (0.79, 1.08)            | 0.32    |
|                                                                                                                | ACCORD, Investigator reported    | 318                  | 2.46              | 336              | 2.63 | 0.93                                     | (0.80, 1.09)            | 0.38    |
| <b>Primary outcome or revascularization or hospitalization for congestive heart failure</b>                    | ACCORD, Adjudication Committee * | 641                  | 5.35              | 667              | 5.64 | 0.94                                     | (0.85, 1.05)            | 0.30    |
|                                                                                                                | ACCORD, Clinical Site            | 674                  | 5.67              | 696              | 5.91 | 0.96                                     | (0.86, 1.07)            | 0.44    |
| <b>Major coronary disease event (fatal coronary event, nonfatal myocardial infarction, or unstable angina)</b> | ACCORD, Adjudication Committee*  | 332                  | 2.58              | 353              | 2.79 | 0.92                                     | (0.79, 1.07)            | 0.26    |
|                                                                                                                | ACCORD, Investigator reported    | 344                  | 2.68              | 372              | 2.95 | 0.91                                     | (0.78, 1.05)            | 0.20    |
| <b>Nonfatal myocardial infarction</b>                                                                          | ACCORD, Adjudication Committee*  | 173                  | 1.32              | 186              | 1.44 | 0.91                                     | (0.74, 1.12)            | 0.39    |
|                                                                                                                | ACCORD, Investigator reported    | 181                  | 1.38              | 202              | 1.57 | 0.88                                     | (0.72, 1.08)            | 0.21    |
| <b>Nonfatal stroke</b>                                                                                         | ACCORD Adjudication Committee    | 47                   | 0.35              | 40               | 0.30 | 1.17                                     | (0.76, 1.78)            | 0.48    |
|                                                                                                                | ACCORD, Investigator reported    | 78                   | 0.59              | 58               | 0.44 | 1.34                                     | (0.96, 1.89)            | 0.09    |
| <b>Fatal or nonfatal stroke</b>                                                                                | ACCORD Adjudication Committee *  | 51                   | 0.38              | 48               | 0.36 | 1.05                                     | (0.71, 1.56)            | 0.80    |

|                                                                                                  |                                              |      |      |      |      |      |              |      |
|--------------------------------------------------------------------------------------------------|----------------------------------------------|------|------|------|------|------|--------------|------|
|                                                                                                  | ACCORD, Investigator                         | 82   | 0.62 | 65   | 0.49 | 1.26 | (0.91, 1.74) | 0.16 |
| <b>All cause mortality</b>                                                                       | ACCORD, Adjudication Committee               | 203  | 1.49 | 221  | 1.64 | 0.91 | (0.75, 1.10) | 0.34 |
|                                                                                                  | ACCORD, Investigator reported                | 203  | 1.49 | 221  | 1.64 | 0.91 | (0.75, 1.10) | 0.34 |
| <b>Cardiovascular mortality</b>                                                                  | ACCORD Adjudication Committee *              | 99   | 0.72 | 114  | 0.83 | 0.86 | (0.66, 1.12) | 0.26 |
|                                                                                                  | ACCORD, Investigator reported                | 93   | 0.68 | 108  | 0.80 | 0.86 | (0.65, 1.13) | 0.27 |
| <b>Fatal or nonfatal congestive heart failure</b>                                                | ACCORD, Adjudication Committee *             | 120  | 0.90 | 143  | 1.09 | 0.82 | (0.65, 1.05) | 0.10 |
|                                                                                                  | ACCORD, Investigator reported                | 114  | 0.86 | 146  | 1.11 | 0.77 | (0.60, 0.99) | 0.04 |
| <b>Nonfatal myocardial infarction, nonfatal stroke, or all cause mortality</b>                   | ACCORD Adjudication Committee, During ACCORD | NR** | NR** | NR** | NR** | NR** | NR**         | NR** |
|                                                                                                  | Clinical Site, Investigator reported         | 417  | 3.23 | 425  | 3.32 | 0.97 | (0.85, 1.11) | 0.68 |
| <b>*As Reported in <u>NEJM</u> 2010;362    <sup>¶</sup> CVD event rate per 100 person years</b>  |                                              |      |      |      |      |      |              |      |
| <b>** NR: Not reported in <u>NEJM</u> 2010;362 because it was not an ACCORD Protocol Outcome</b> |                                              |      |      |      |      |      |              |      |

**eTable 2: Comparison of CVD Outcomes by sex and dyslipidemia in ACCORD and with addition of extended follow-up in ACCORDION.**

| Study Period                 | Subgroups              | CVD Events Fenofibrate Group | CVD Events Placebo Group | Hazard Ratio (95% CI)   | P Value for Interaction |
|------------------------------|------------------------|------------------------------|--------------------------|-------------------------|-------------------------|
| <b>ACCORD*</b>               | Male                   | 214 (11.2%)                  | 254 (13.3%)              | 0.82 (0.69-0.99)        | 0.0106                  |
| <b>ACCORD</b>                | Female                 | 77 (9.1%)                    | 56 (6.6%)                | 1.38 (0.98-1.95)        |                         |
| <b>ACCORDION<sup>§</sup></b> | <b>Male</b>            | <b>374 (19.7%)</b>           | <b>433 (22.8%)</b>       | <b>0.84 (0.73-0.96)</b> | <b>0.0028</b>           |
| <b>ACCORDION</b>             | <b>Female</b>          | <b>134 (15.9%)</b>           | <b>106 (12.7%)</b>       | <b>1.30 (1.01-1.68)</b> |                         |
| <b>ACCORD</b>                | Dyslipidemia**         | 60 (12.4%)                   | 79 (17.3%)               | 0.69 (0.49-0.97)        | 0.0571                  |
| <b>ACCORD</b>                | No Dyslipidemia        | 229 (10.1%)                  | 231 (10.1%)              | 0.99 (0.83-1.19)        |                         |
| <b>ACCORDION</b>             | <b>Dyslipidemia</b>    | <b>99 (20.5%)</b>            | <b>121 (26.7%)</b>       | <b>0.73 (0.56-0.95)</b> | <b>0.0483</b>           |
| <b>ACCORDION</b>             | <b>No Dyslipidemia</b> | <b>407 (18.2%)</b>           | <b>415 (18.3%)</b>       | <b>0.99 (0.86-1.13)</b> |                         |

\* From Ginsberg H. et al NEJM 362:1563, 2010. \*\* Dyslipidemia defined as TG  $\geq$  204 mg/dl and HDL-C  $\leq$  34 mg/dl. ¶ CVD events are number of events during follow up period and percentage of participants in that subgroup who experienced a primary cardiovascular outcome (fatal and nonfatal coronary event or stroke). § ACCORDION = ACCORD events plus events during extended follow-up in ACCORDION.

**eFigure 1. Lipid Levels By ACCORD Treatment Arm from Randomization Through the End of ACCORDION**

**Mean Cholesterol Levels with 95% CI Error Bars**

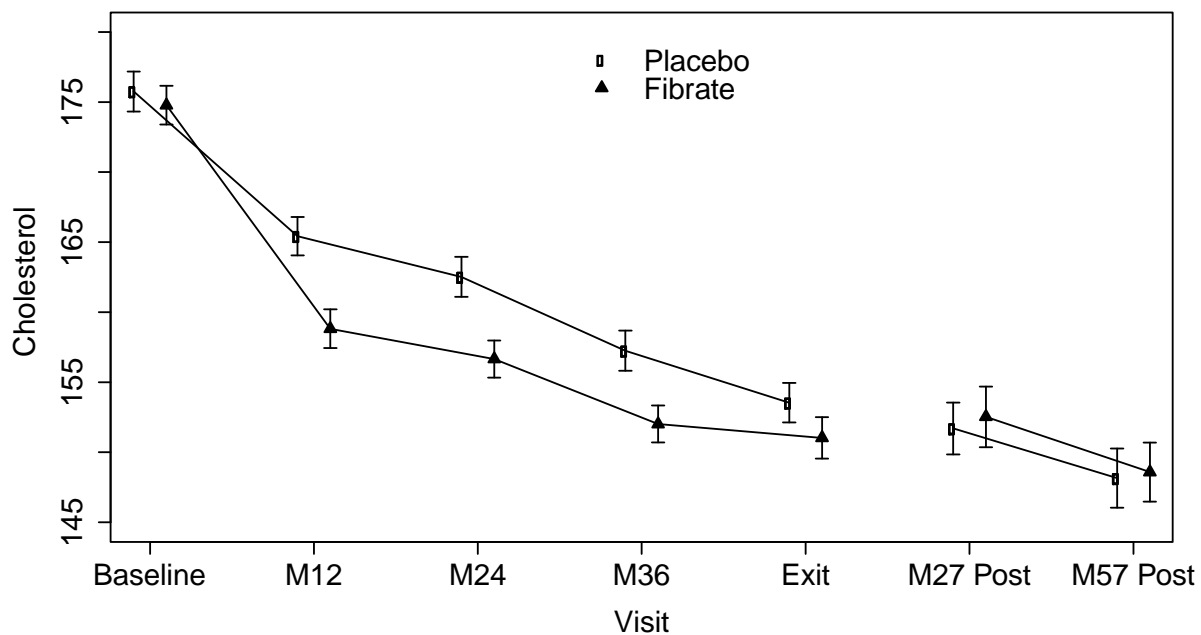

**Mean LDL Levels with 95% CI Error Bars**

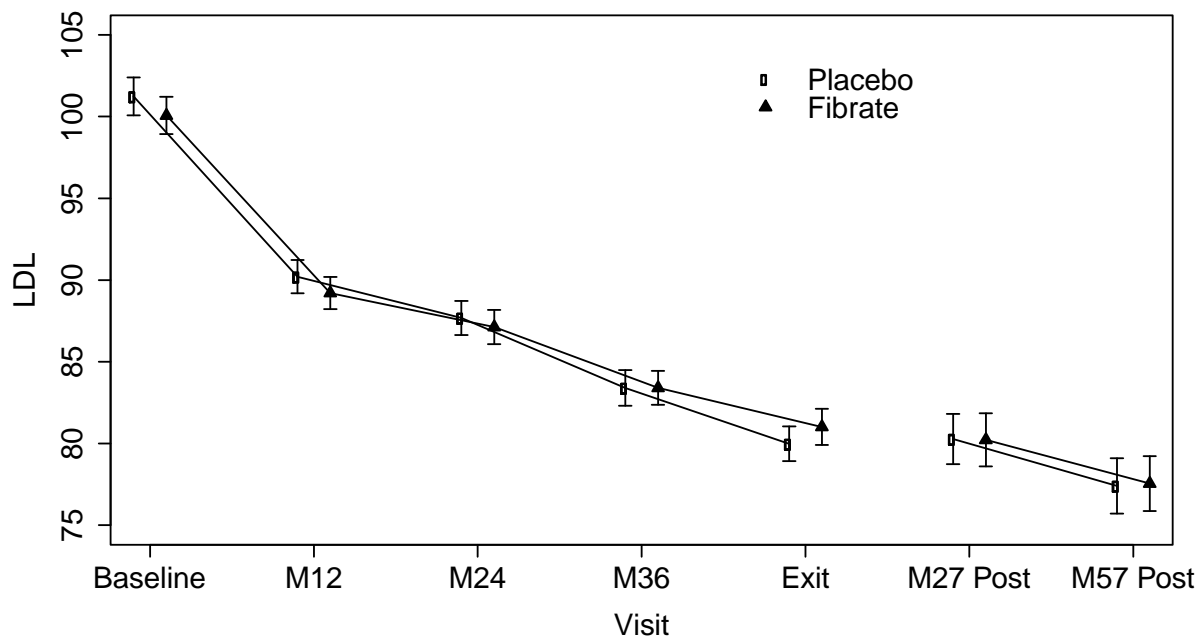

### Mean HDL Levels with 95% CI Error Bars

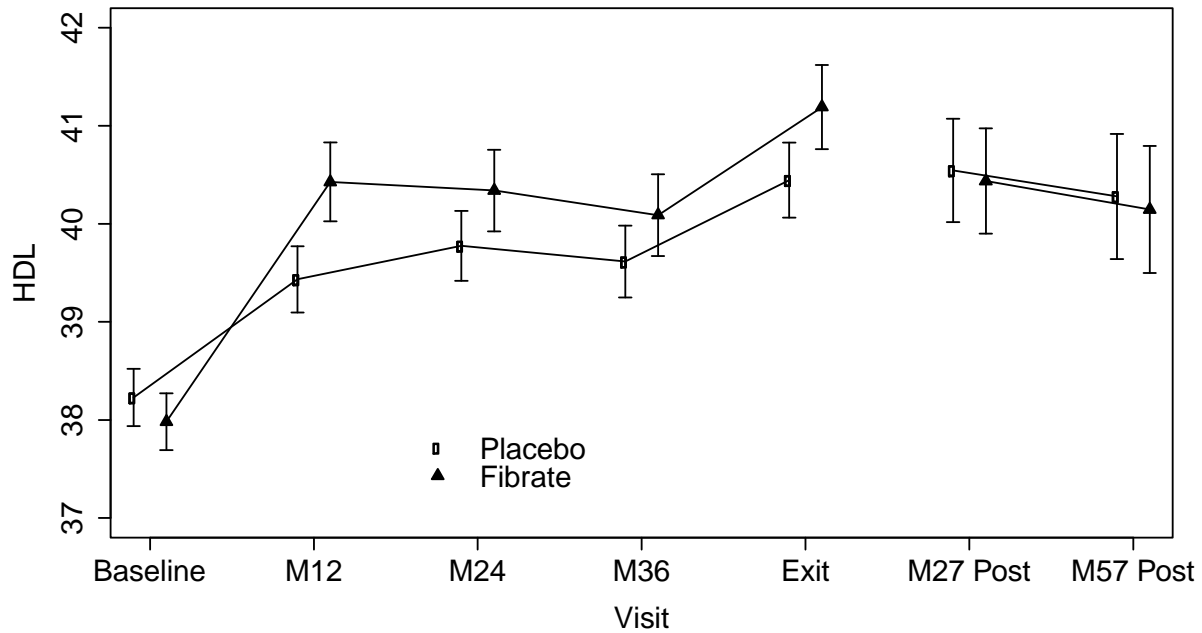

### Mean Triglyceride Levels with 95% CI Error Bars

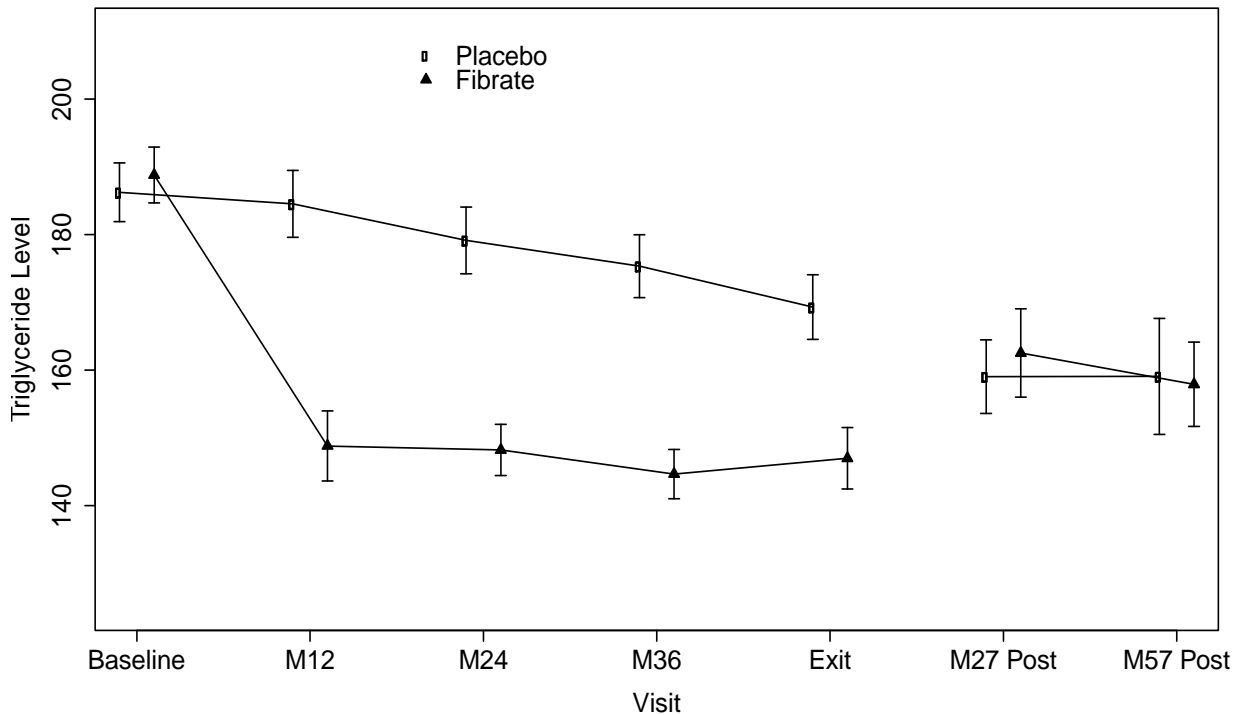

Data are plasma lipoprotein levels (total cholesterol, LDL-C, HDL-C, and total triglyceride) in mg/dl by month post-randomization for ACCORD, at the ACCORD final visit (Exit), and month post-completion of double blind treatment phase of ACCORD for ACCORDION. Following completion of ACCORD lipid therapy was directed by participant's primary care providers.



**eFigure 2.** Lipid Response to Fenofibrate in Hypertriglyceridemic/Low HDL-C Subgroup vs all others in ACCORD: HDL-C and Triglyceride.

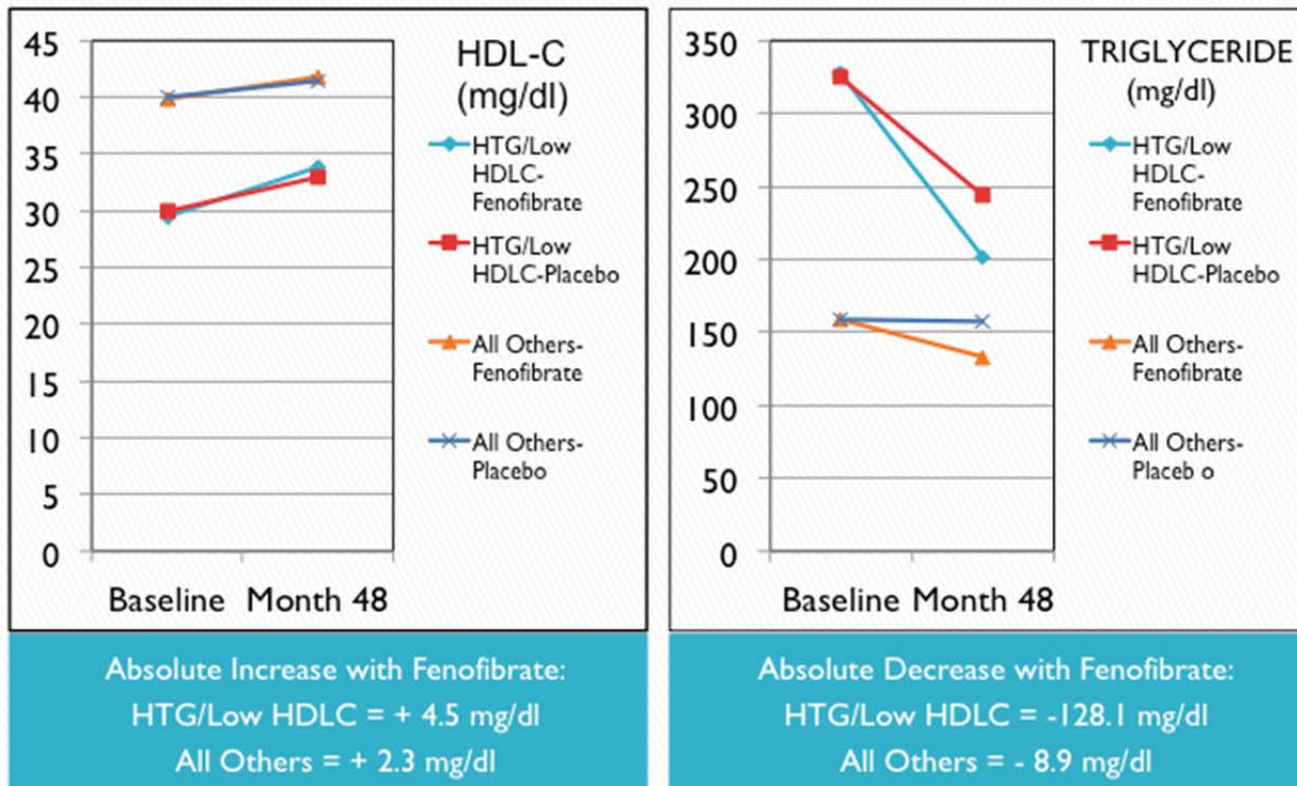

Data are mean LDL-C and Non-HDLC (mg/dl) at baseline and Month 48 post-randomization by Fenofibrate treatment assignment for participants with hypertriglyceridemia (> 204 mg/dl) and low HDL-C (< 32 mg/dl) at Baseline visit versus all others.



**eFigure 3.** Lipid Response to Fenofibrate in Hypertriglyceridemic/Low HDL-C Subgroup vs all others in ACCORD: LDL-C and Non-HDLC.

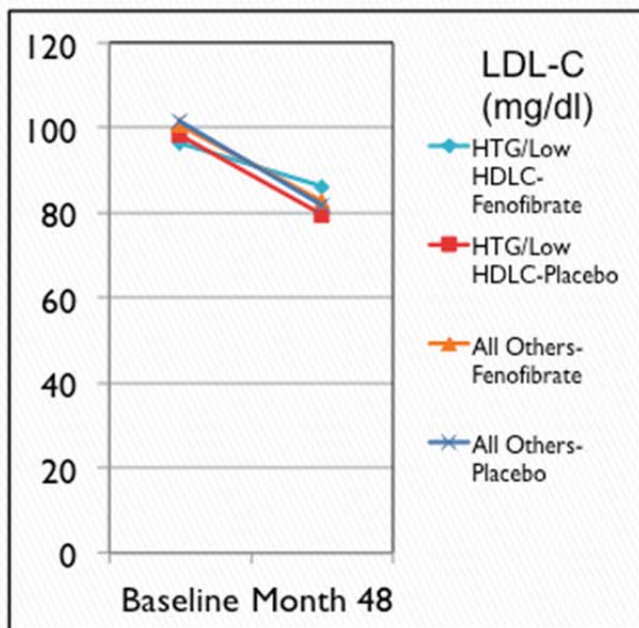

absolute decrease with fenofibrate:  
HTG-Low HDLC subgroup = -10 mg/dl  
All Others = -20.6 mg/dl

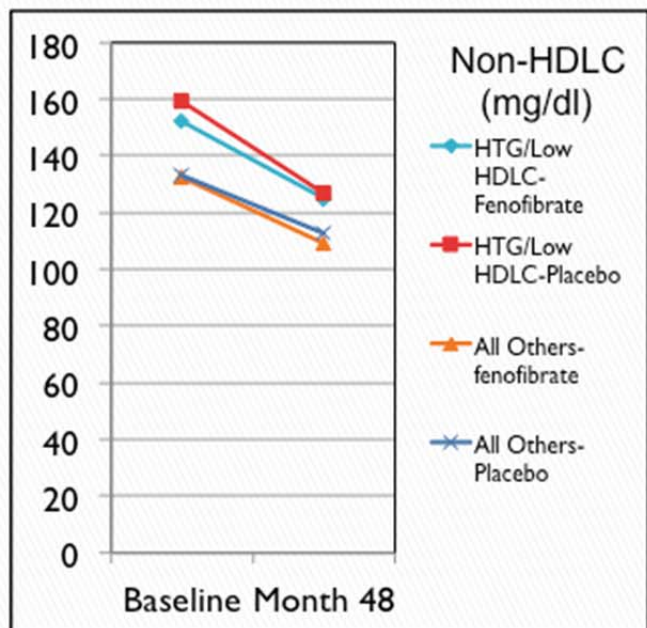

absolute decrease with fenofibrate:  
HTG-Low HDLC subgroup = -17.7 mg/dl  
All Others = -17.6 mg/dl

Data are mean LDL-C and Non-HDLC (mg/dl) at baseline and Month 48 post-randomization by Fenofibrate treatment assignment for participants with hypertriglyceridemia (> 204 mg/dl) and low HDL-C (< 32 mg/dl) at Baseline visit versus all others.
